# Supplementary material for: Validation of the Arabic Severe Respiratory Insufficiency Questionnaire
Source: Springer Nature journal article supplement (doi:10.1186/s12890-021-01644-x), 2021-10-11
Supplement: MOESM1 [file 19746608]

## Validation of the Arabic Severe Respiratory Insufficiency Questionnaire

Marwan F. Alawieh<sup>a</sup>, Rania N. Bzeih<sup>†b</sup>, Abla M. Sibai<sup>c</sup>, Mohamad F. El-Khatib<sup>a</sup>, Lilian A. Ghandour<sup>c\*</sup>, Salah M. Zeineldine<sup>d\*</sup>

<sup>a</sup> Department of Anesthesiology/ Inhalation Therapy Department - American University of Beirut Medical Center

<sup>b</sup> Nursing Department - American University of Beirut Medical Center

<sup>c</sup> Department of Epidemiology and Population Health, Faculty of Health Sciences American University of Beirut

<sup>d</sup> Internal Medicine - Pulmonary Division American University of Beirut Medical Center

### Part I: General Information

|            |                                          |                                           |                                 |
|------------|------------------------------------------|-------------------------------------------|---------------------------------|
| <b>SD1</b> | Gender                                   | 1                                         | Male                            |
|            |                                          | 2                                         | Female                          |
| <b>SD2</b> | Age                                      | Age at last birthday    [ ][ ] yrs        |                                 |
|            |                                          | Date of birth (year only)    [ ][ ][ ][ ] |                                 |
| <b>SD3</b> | What is your highest educational level?  | 1                                         | Illiterate                      |
|            |                                          | 2                                         | Read and write                  |
|            |                                          | 3                                         | Elementary                      |
|            |                                          | 4                                         | Intermediate                    |
|            |                                          | 5                                         | Secondary                       |
|            |                                          | 6                                         | University                      |
|            |                                          | 7                                         | Post graduate                   |
|            |                                          | 8                                         | Other, specify: -----           |
| <b>SD4</b> | What is your current occupational status | 1                                         | Housewife                       |
|            |                                          | 2                                         | Retired                         |
|            |                                          | 3                                         | Not working (looking for a job) |
|            |                                          | 4                                         | Disabled                        |
|            |                                          | 5                                         | Employee (full time)            |
|            |                                          | 6                                         | Employee (part time)            |
|            |                                          | 7                                         | Self employed                   |
|            |                                          | 8                                         | Other, specify: -----           |
| <b>SD5</b> | What is you marital status?              | 1                                         | Single                          |

|      |                                                                                     |   |                                                                                                                   |
|------|-------------------------------------------------------------------------------------|---|-------------------------------------------------------------------------------------------------------------------|
|      |                                                                                     | 2 | Married                                                                                                           |
|      |                                                                                     | 3 | Widowed                                                                                                           |
|      |                                                                                     | 4 | Separated/Divorced                                                                                                |
| SD6  | What is your current smoking status?                                                | 0 | None-smoker (never smoked before)<br><b>(If selected, skip to SD15)</b>                                           |
|      |                                                                                     | 1 | Ex-smoker (had smoked at least one cigarette/session of water pipe per day for at least six months but had quit). |
|      |                                                                                     | 2 | Current smoker (smoke at least one cigarette or one session of water pipe per day).                               |
| SD7  | How many packs of cigarettes do you currently smoke per day?                        | 0 | Not applicable                                                                                                    |
|      |                                                                                     | 1 | Pack: -----                                                                                                       |
| SD8  | At which age did you start smoking cigarettes?                                      | 0 | Not applicable                                                                                                    |
|      |                                                                                     | 1 | [ ][ ] yrs                                                                                                        |
| SD9  | If you are an ex cigarette smoker, at which age did you stop smoking?               | 0 | Not applicable                                                                                                    |
|      |                                                                                     | 1 | [ ][ ] yrs                                                                                                        |
| SD10 | If you are an ex cigarette smoker, how many packs did you use to smoke per day?     | 0 | Not applicable                                                                                                    |
|      |                                                                                     | 1 | Pack: -----                                                                                                       |
| SD11 | How many waterpipe sessions do you currently smoke per day?                         | 0 | Not applicable                                                                                                    |
|      |                                                                                     | 1 | Sessions: -----                                                                                                   |
| SD12 | At which age did you start smoking waterpipe?                                       | 0 | Not applicable                                                                                                    |
|      |                                                                                     | 1 | [ ][ ] yrs                                                                                                        |
| SD13 | If you are an ex waterpipe smoker, at which age did you stop smoking?               | 0 | Not applicable                                                                                                    |
|      |                                                                                     | 1 | [ ][ ] yrs                                                                                                        |
| SD14 | If you are an ex waterpipe smoker, how many sessions did you use to smoker per day? | 0 | Not applicable                                                                                                    |
|      |                                                                                     | 1 | Sessions: -----                                                                                                   |
| SD15 | Who lives with you at the home?                                                     | A | I live alone<br><input type="checkbox"/> No = 0 <input type="checkbox"/> Yes = 1                                  |
|      |                                                                                     | B | My spouse<br><input type="checkbox"/> No = 0 <input type="checkbox"/> Yes = 1                                     |
|      |                                                                                     | C | My child/children                                                                                                 |

|             |                                                                          |                                                                                                     |
|-------------|--------------------------------------------------------------------------|-----------------------------------------------------------------------------------------------------|
|             |                                                                          | <input type="checkbox"/> No = 0 <input type="checkbox"/> Yes = 1                                    |
|             |                                                                          | <b>D</b> My daughter-son in law<br><input type="checkbox"/> No = 0 <input type="checkbox"/> Yes = 1 |
|             |                                                                          | <b>E</b> Other relatives<br><input type="checkbox"/> No = 0 <input type="checkbox"/> Yes = 1        |
|             |                                                                          | <b>F</b> A maid<br><input type="checkbox"/> No = 0 <input type="checkbox"/> Yes = 1                 |
|             |                                                                          | <b>G</b> A nurse<br><input type="checkbox"/> No = 0 <input type="checkbox"/> Yes = 1                |
|             |                                                                          | <b>A</b> Nobody<br><input type="checkbox"/> No = 0 <input type="checkbox"/> Yes = 1                 |
|             |                                                                          | <b>B</b> My spouse<br><input type="checkbox"/> No = 0 <input type="checkbox"/> Yes = 1              |
|             |                                                                          | <b>C</b> My child/children<br><input type="checkbox"/> No = 0 <input type="checkbox"/> Yes = 1      |
|             |                                                                          | <b>D</b> My daughter-son in law<br><input type="checkbox"/> No = 0 <input type="checkbox"/> Yes = 1 |
|             |                                                                          | <b>E</b> Other relatives<br><input type="checkbox"/> No = 0 <input type="checkbox"/> Yes =          |
|             |                                                                          | <b>F</b> A maid<br><input type="checkbox"/> No = 0 <input type="checkbox"/> Yes = 1                 |
|             |                                                                          | <b>G</b> A nurse<br><input type="checkbox"/> No = 0 <input type="checkbox"/> Yes = 1                |
| <b>SD16</b> | Who takes care of you at home?<br>(help you in daily life duties)        |                                                                                                     |
| <b>SD17</b> | Who of the above most takes care of you?                                 | Specify: .....                                                                                      |
| <b>SD18</b> | How would you rate your health compared to other people of the same age? | <b>1</b> Much worse                                                                                 |
|             |                                                                          | <b>2</b> Worse                                                                                      |
|             |                                                                          | <b>3</b> Same                                                                                       |
|             |                                                                          | <b>4</b> Better                                                                                     |
|             |                                                                          | <b>5</b> Much better                                                                                |
| <b>SD19</b> |                                                                          | <b>A</b> NSSF<br><input type="checkbox"/> No = 0 <input type="checkbox"/> Yes = 1                   |

|                                                                                                                       |                                                                                                                             |
|-----------------------------------------------------------------------------------------------------------------------|-----------------------------------------------------------------------------------------------------------------------------|
| <p>How are you covering the expenses of the therapy? (the mechanical ventilation machine and supplemental oxygen)</p> | <p><b>B</b> Cooperative of Government Employees<br/> <input type="checkbox"/> No = 0   <input type="checkbox"/> Yes = 1</p> |
|                                                                                                                       | <p><b>C</b> Army/police<br/> <input type="checkbox"/> No = 0   <input type="checkbox"/> Yes = 1</p>                         |
|                                                                                                                       | <p><b>D</b> Ministry of public health<br/> <input type="checkbox"/> No = 0   <input type="checkbox"/> Yes = 1</p>           |
|                                                                                                                       | <p><b>E</b> Private insurance<br/> <input type="checkbox"/> No = 0   <input type="checkbox"/> Yes = 1</p>                   |
|                                                                                                                       | <p><b>F</b> Self payer<br/> <input type="checkbox"/> No = 0   <input type="checkbox"/> Yes = 1</p>                          |
|                                                                                                                       | <p><b>G</b> Other</p>                                                                                                       |

**Part II. Medical history**

|                   |                                                                                       |                                                                                                                                                    |
|-------------------|---------------------------------------------------------------------------------------|----------------------------------------------------------------------------------------------------------------------------------------------------|
| <p><b>MH1</b></p> | <p>What is the underlying diagnoses leading to your respiratory failure?</p>          | <p><b>A</b> COPD<br/> <input type="checkbox"/> No = 0   <input type="checkbox"/> Yes = 1</p>                                                       |
|                   |                                                                                       | <p><b>B</b> Kyphoscoliosis<br/> <input type="checkbox"/> No = 0   <input type="checkbox"/> Yes = 1</p>                                             |
|                   |                                                                                       | <p><b>C</b> Neuromuscular disease<br/> <input type="checkbox"/> No = 0   <input type="checkbox"/> Yes = 1</p>                                      |
|                   |                                                                                       | <p><b>D</b> Obesity-hypoventilation syndrome<br/> <input type="checkbox"/> No = 0   <input type="checkbox"/> Yes = 1</p>                           |
|                   |                                                                                       | <p><b>E</b> Other, specify: -----</p>                                                                                                              |
| <p><b>MH2</b></p> | <p>What is the main indication for the initiation of home mechanical ventilation?</p> | <p><b>A</b> Low oxygen saturation even after using supplemental oxygen<br/> <input type="checkbox"/> No = 0   <input type="checkbox"/> Yes = 1</p> |

|            |                                                                                                            |          |                                                                                                |
|------------|------------------------------------------------------------------------------------------------------------|----------|------------------------------------------------------------------------------------------------|
|            |                                                                                                            | <b>B</b> | High carbon dioxide levels<br><input type="checkbox"/> No = 0 <input type="checkbox"/> Yes = 1 |
|            |                                                                                                            | <b>C</b> | Dyspnea during night<br><input type="checkbox"/> No = 0 <input type="checkbox"/> Yes = 1       |
|            |                                                                                                            | <b>D</b> | Apnea during night<br><input type="checkbox"/> No = 0 <input type="checkbox"/> Yes = 1         |
|            |                                                                                                            | <b>E</b> | Other, specify: -----                                                                          |
| <b>MH3</b> | How many times did you visit the emergency room during the previous year because of respiratory problems?  |          | [__ __] Times                                                                                  |
| <b>MH4</b> | How many times were you admitted to the hospital during the previous year because of respiratory problems? |          | [__ __] Times                                                                                  |
| <b>MH5</b> | Have you ever been diagnosed with any of these diseases?                                                   | <b>A</b> | Hypertension<br><input type="checkbox"/> No = 0 <input type="checkbox"/> Yes = 1               |
|            |                                                                                                            | <b>B</b> | Diabetes<br><input type="checkbox"/> No = 0 <input type="checkbox"/> Yes = 1                   |
|            |                                                                                                            | <b>C</b> | Renal diseases<br><input type="checkbox"/> No = 0 <input type="checkbox"/> Yes = 1             |
|            |                                                                                                            | <b>D</b> | Obesity<br><input type="checkbox"/> No = 0 <input type="checkbox"/> Yes = 1                    |
|            |                                                                                                            | <b>E</b> | Sleep apnea<br><input type="checkbox"/> No = 0 <input type="checkbox"/> Yes = 1                |

|            |                                                           |          |                                                                                  |
|------------|-----------------------------------------------------------|----------|----------------------------------------------------------------------------------|
|            |                                                           |          | Depression<br>F <input type="checkbox"/> No = 0 <input type="checkbox"/> Yes = 1 |
|            |                                                           |          | G Other, specify: -----                                                          |
| <b>MH6</b> | How do you rate your physical activity?                   | <b>1</b> | Unrestricted normal activity                                                     |
|            |                                                           | <b>2</b> | Restrictions on strenuous activity, able to perform undemanding tasks            |
|            |                                                           | <b>3</b> | Very restricted everyday activity but capable of self-care                       |
|            |                                                           | <b>4</b> | Very restricted everyday activity and incapable of self-care                     |
|            |                                                           | <b>5</b> | Confined to bed/armchair, incapable of self-care                                 |
| <b>MH7</b> | Have you had headaches during the previous week?          | <b>0</b> | No                                                                               |
|            |                                                           | <b>1</b> | Yes                                                                              |
| <b>MH8</b> | Have you had daytime sleepiness during the previous week? | <b>0</b> | No                                                                               |
|            |                                                           | <b>1</b> | Yes                                                                              |

### Part III. Home Mechanical Ventilation

|            |                                                                        |                                       |
|------------|------------------------------------------------------------------------|---------------------------------------|
| <b>MV1</b> | When did you start using the therapy at home (what year)?              | Year [ ][ ][ ][ ]                     |
| <b>MV2</b> | How long have you been using the therapy at home (for how many years)? | [ ][ ][ ][ ] years                    |
| <b>MV3</b> | When do you apply the machine?                                         | <b>1</b> Only during the day          |
|            |                                                                        | <b>2</b> Only during the night        |
|            |                                                                        | <b>3</b> During the day and the night |

|            |                                                                 |                              |
|------------|-----------------------------------------------------------------|------------------------------|
| <b>MV4</b> | How many hours do you use the machine <b>during the day</b> ?   | Specify in hours: -----<br>- |
| <b>MV5</b> | How many hours do you use the machine <b>during the night</b> ? | Specify in hours: -----<br>- |
